# Supplementary material for: In situ sonochemical synthesis of luminescent Sn@C-dots and a hybrid Sn@C-dots@Sn anode for lithium-ion batteries
Source: Royal Society of Chemistry journal article supplement (doi:10.1039/c6ra09926b), 2016-01-01
Supplement: c6ra09926b1.pdf [file c6ra09926b1.pdf]

## Supporting information:

# *In situ* Sonochemical Synthesis of Luminescent Sn@C-dots and Hybrid Sn@C-dots@Sn Anode for Lithium-ion Batteries

Vijay Bhooshan Kumar<sup>a</sup>, Jialiang Tang<sup>b</sup>, Kay Jangweon Lee,<sup>b</sup> Vilas G. Pol<sup>b,\*</sup> and Aharon

Gedanken<sup>a,\*</sup>

<sup>a</sup>Department of Chemistry and Bar-Ilan Institute for Nanotechnology & Advanced Materials,

Bar Ilan University, Ramat-Gan 52900, Israel

<sup>b</sup>School of Chemical Engineering, Purdue University, 480 Stadium Mall Drive West Lafayette,

Indiana 47907, USA.

\*Corresponding author emails: [vpol@purdue.edu](mailto:vpol@purdue.edu), [gedanken@mail.biu.ac.il](mailto:gedanken@mail.biu.ac.il)

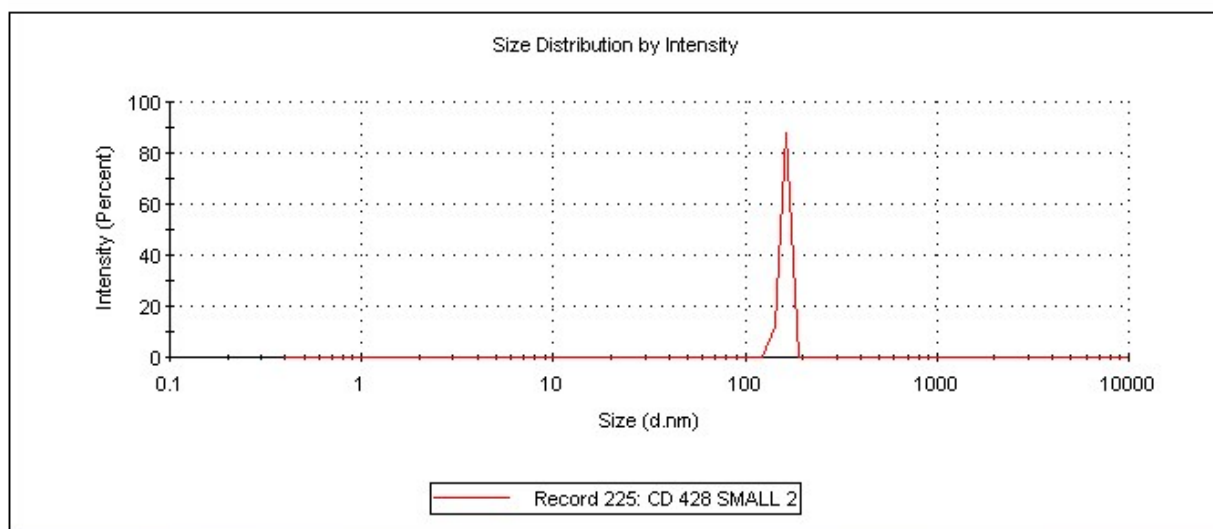

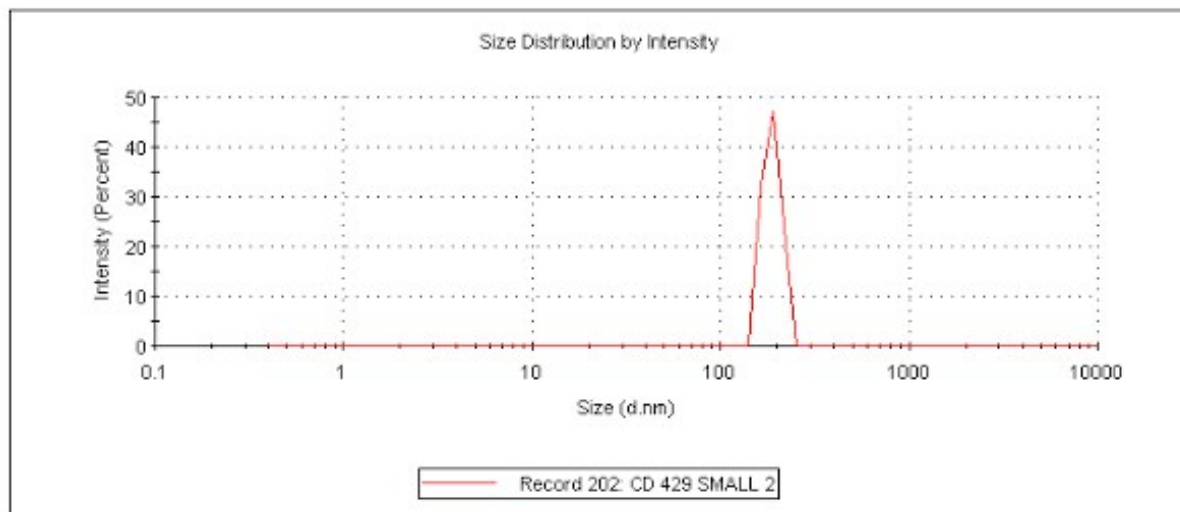

**Figure S1:** DLS pattern of sonochemical deposition of Sn@C-dots@Sn NPs (a) 12 minutes' sonication, (b) 15 min sonication.

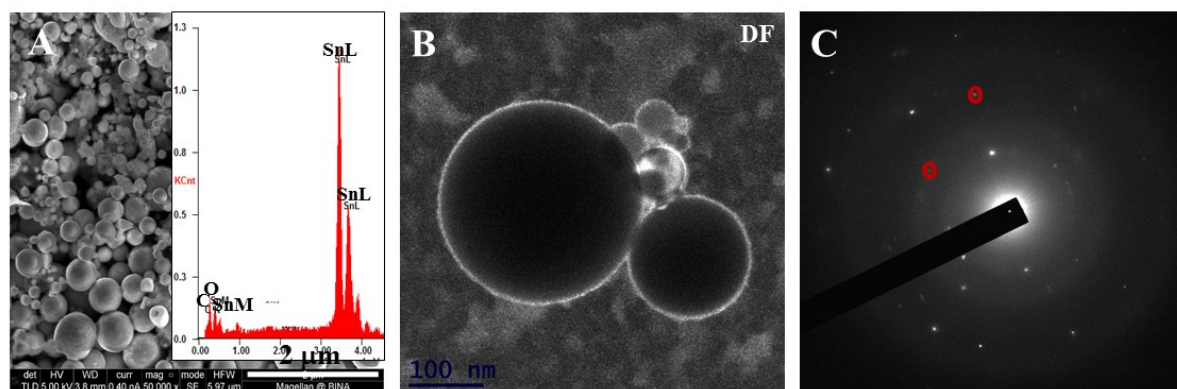

**Figure S2:** (A) SEM images with EDS analysis of the Sn@C-dots@Sn NPs obtained by 12 minutes' sonication, (B) Dark filed microscopy image obtained from (C) Selected area electron diffraction pattern and marked by red color for dark field image.
